# Supplementary material for: High-Density Lipoprotein Particles and Torque Teno Virus in Stable Outpatient Kidney Transplant Recipients
Source: MDPI journal article supplement (doi:10.3390/v16010143), 2024-01-18
Supplement: s1 [file s1]

## Supplementary data

### Supplementary Figure S1

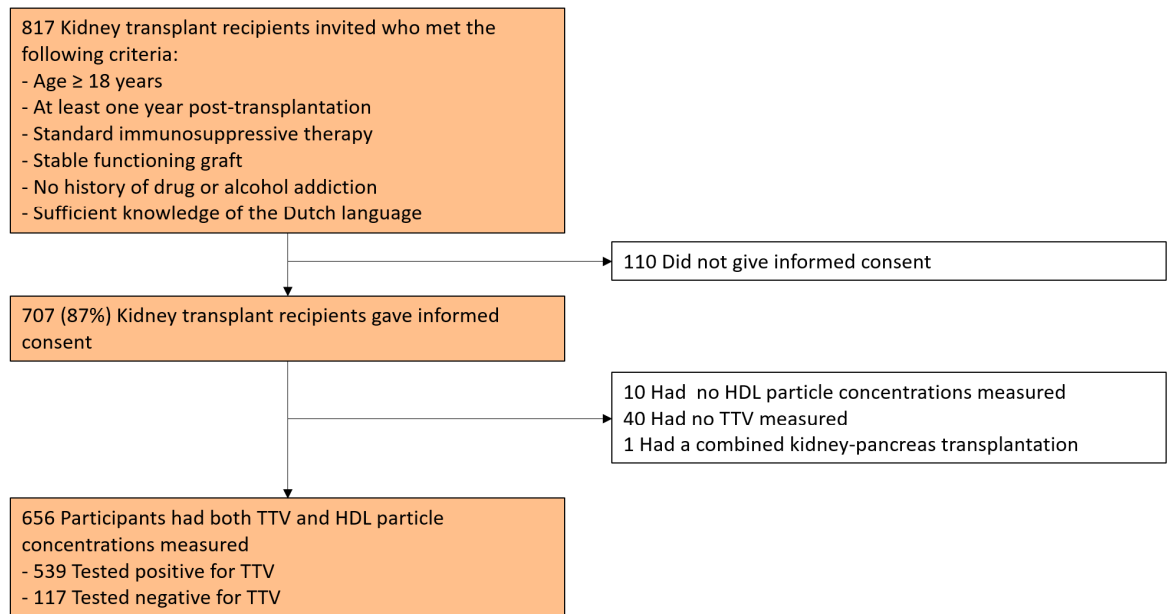

Supplementary Figure S1. flow chart illustrating the participant selection process for this article.

## Supplementary Table S1

Supplementary Table S1. results of multivariable linear regression using. TTV load is the dependent variable. Continuous variables were standardized (st.β. with 95 % confidence intervals). Model 5 is the only model that includes data from both the non-smoking and the smoking TTV positive participants.

|                                        | Model 5 ( $R^2 = 0.12$ , n = 500) |              |         |
|----------------------------------------|-----------------------------------|--------------|---------|
|                                        | St. β                             | 95% CI st. β | P-value |
| Age of the recipient                   | 0.11                              | 0.02; 0.20   | 0.020   |
| Female sex                             | -0.04                             | -0.23; 0.14  | 0.638   |
| Smoking behaviour                      |                                   |              |         |
| - Never smoked cigarettes              | Reference                         |              |         |
| - Stopped smoking cigarettes           | -0.12                             | -0.31; 0.07  | 0.219   |
| - Current cigarette smoking            | -0.36                             | -0.64; -0.08 | 0.012   |
| Average daily alcohol intake >10 grams | -0.12                             | -0.31; 0.08  | 0.238   |
| Hemoglobin                             | -0.07                             | -0.16; 0.03  | 0.173   |
| eGFR                                   | -0.05                             | -0.15; 0.06  | 0.385   |
| Age of the donor                       | -0.03                             | -0.13; 0.08  | 0.616   |
| Allograft vintage                      | -0.10                             | -0.20; 0.01  | 0.064   |
| Calcineurin inhibitor usage            |                                   |              |         |
| - Not using a calcineurin inhibitor    | Reference                         |              |         |
| - Using cyclosporin                    | 0.32                              | 0.12; 0.52   | 0.002   |
| - Using tacrolimus                     | 0.56                              | 0.30; 0.82   | <0.001  |
| Total HDL particle concentration       | -0.10                             | -0.19; -0.01 | 0.024   |

## Supplementary Table S2

Supplementary Table S2. results of multivariable linear regression using. TTV load is the dependent variable. Continuous variables were standardized (st.β. with 95 % confidence intervals). Models 6 to 8 contain particle concentrations of the size-based HDL subspecies, model 9 contains all concentrations of the three size-based HDL subspecies. Abbreviations: sHDL, small HDL, mHDL, medium HDL; IHDL, large HDL.

|                                        | Model 6 (R <sup>2</sup> = 0.11, n = 440) |              |         | Model 7 (R <sup>2</sup> = 0.10, n = 440) |              |         | Model 8 (R <sup>2</sup> = 0.11, n = 440) |              |         | Model 9 (R <sup>2</sup> = 0.12, n = 440) |              |         |
|----------------------------------------|------------------------------------------|--------------|---------|------------------------------------------|--------------|---------|------------------------------------------|--------------|---------|------------------------------------------|--------------|---------|
|                                        | St. β                                    | 95% CI st. β | P-value | St. β                                    | 95% CI st. β | P-value | St. β                                    | 95% CI st. β | P-value | St. β                                    | 95% CI st. β | P-value |
| Age of the recipient                   | 0.07                                     | -0.02; 0.17  | 0.121   | 0.08                                     | -0.01; 0.18  | 0.084   | 0.10                                     | 0.00; 0.19   | 0.048   | 0.08                                     | -0.02; 0.17  | 0.112   |
| Female sex                             | -0.04                                    | -0.23; 0.15  | 0.689   | -0.03                                    | -0.23; 0.16  | 0.741   | 0.00                                     | -0.20; 0.20  | 0.982   | 0.03                                     | -0.17; 0.23  | 0.773   |
| Average daily alcohol intake >10 grams | -0.18                                    | -0.39; 0.02  | 0.076   | -0.2                                     | -0.40; 0.01  | 0.059   | -0.20                                    | -0.40; 0.01  | 0.060   | -0.15                                    | -0.36; 0.06  | 0.159   |
| Hemoglobin                             | -0.05                                    | -0.16; 0.05  | 0.321   | -0.06                                    | -0.17; 0.04  | 0.248   | -0.07                                    | -0.18; 0.03  | 0.170   | -0.06                                    | -0.16; 0.05  | 0.291   |
| eGFR                                   | -0.06                                    | -0.17; 0.04  | 0.238   | -0.07                                    | -0.18; 0.04  | 0.191   | -0.06                                    | -0.17; 0.05  | 0.274   | -0.04                                    | -0.15; 0.07  | 0.431   |
| Age of the donor                       | -0.03                                    | -0.14; 0.09  | 0.657   | -0.02                                    | -0.13; 0.09  | 0.707   | -0.02                                    | -0.13; 0.09  | 0.684   | -0.02                                    | -0.13; 0.09  | 0.672   |
| Allograft vintage                      | -0.09                                    | -0.20; 0.02  | 0.103   | -0.08                                    | -0.20; 0.03  | 0.141   | -0.09                                    | -0.20; 0.03  | 0.129   | -0.08                                    | -0.20; 0.03  | 0.139   |
| Calcineurin inhibitor usage            | Reference                                |              |         | Reference                                |              |         | Reference                                |              |         | Reference                                |              |         |
| - Not using a calcineurin inhibitor    | 0.28                                     | 0.07; 0.50   | 0.010   | 0.32                                     | 0.10; 0.54   | 0.005   | 0.31                                     | 0.10; 0.53   | 0.004   | 0.31                                     | 0.09; 0.53   | 0.005   |
| - Using cyclosporin                    | 0.60                                     | 0.32; 0.89   | <0.001  | 0.62                                     | 0.34; 0.90   | <0.001  | 0.64                                     | 0.36; 0.92   | <0.001  | 0.61                                     | 0.32; 0.89   | <0.001  |
| - Using tacrolimus                     |                                          |              |         |                                          |              |         |                                          |              |         |                                          |              |         |
| sHDL concentration                     | -0.10                                    | -0.19; 0.00  | 0.044   |                                          |              |         |                                          |              |         | -0.12                                    | -0.22; -0.02 | 0.017   |
| mHDL concentration                     |                                          |              |         | -0.02                                    | -0.12; 0.08  | 0.682   |                                          |              |         | -0.06                                    | -0.17; 0.04  | 0.220   |
| IHDL concentration                     |                                          |              |         |                                          |              |         | -0.07                                    | -0.16; 0.03  | 0.182   | -0.07                                    | -0.17; 0.03  | 0.163   |

### Supplementary Table S3

Supplementary Table S3. results of multivariable linear regression using. TTV load is the dependent variable. Continuous variables were standardized (st.β. with 95 % confidence intervals). Models 10 to 12 contain tHDL particle concentration and proportions of the subspecies. Model 13 is the sensitivity analysis wherein the participants with the 2.5% highest and 2.5% lowest TTV load and also the participants with the 2.5% highest and 2.5% lowest tHDL concentration were excluded. Abbreviations: sHDL, small HDL, mHDL, medium HDL; lHDL, large HDL.

|                                        | Model 10 (R <sup>2</sup> = 0.12, n = 440) |              |         | Model 11 (R <sup>2</sup> = 0.12, n = 440) |              |         | Model 12 (R <sup>2</sup> = 0.12, n = 440) |              |         | Model 13 (R <sup>2</sup> = 0.09, n = 416) |              |         |
|----------------------------------------|-------------------------------------------|--------------|---------|-------------------------------------------|--------------|---------|-------------------------------------------|--------------|---------|-------------------------------------------|--------------|---------|
|                                        | St. β                                     | 95% CI st. β | P-value | St. β                                     | 95% CI st. β | P-value | St. β                                     | 95% CI st. β | P-value | St. β                                     | 95% CI st. β | P-value |
| Age of the recipient                   | 0.08                                      | -0.02; 0.17  | 0.109   | 0.08                                      | -0.02; 0.17  | 0.109   | 0.07                                      | -0.02; 0.17  | 0.129   | 0.07                                      | -0.03; 0.17  | 0.154   |
| Female sex                             | 0.03                                      | -0.18; 0.23  | 0.789   | 0.03                                      | -0.17; 0.23  | 0.754   | 0.03                                      | -0.18; 0.23  | 0.801   | -0.01                                     | -0.23; 0.20  | 0.904   |
| Average daily alcohol intake >10 grams | -0.15                                     | -0.36; 0.06  | 0.156   | -0.15                                     | -0.35; 0.06  | 0.164   | -0.15                                     | -0.35; 0.06  | 0.160   | -0.13                                     | -0.35; 0.09  | 0.244   |
| Hemoglobin                             | -0.06                                     | -0.16; 0.05  | 0.294   | -0.06                                     | -0.16; 0.05  | 0.295   | -0.05                                     | -0.16; 0.05  | 0.321   | -0.10                                     | -0.21; 0.01  | 0.084   |
| eGFR                                   | -0.04                                     | -0.15; 0.07  | 0.424   | -0.04                                     | -0.15; 0.07  | 0.429   | -0.05                                     | -0.16; 0.06  | 0.416   | 0.01                                      | -0.10; 0.12  | 0.870   |
| Age of the donor                       | -0.02                                     | -0.13; 0.09  | 0.676   | -0.02                                     | -0.13; 0.09  | 0.682   | -0.02                                     | -0.13; 0.09  | 0.679   | -0.05                                     | -0.17; 0.06  | 0.363   |
| Allograft vintage                      | -0.08                                     | -0.19; 0.03  | 0.138   | -0.08                                     | -0.19; 0.03  | 0.144   | -0.08                                     | -0.19; 0.03  | 0.138   | -0.11                                     | -0.22; 0.01  | 0.072   |
| Calcineurin inhibitor usage            | Reference                                 |              |         | Reference                                 |              |         | Reference                                 |              |         | Reference                                 |              |         |
| - Not using a calcineurin inhibitor    | 0.31                                      | 0.09; 0.53   | 0.005   | 0.31                                      | 0.10; 0.53   | 0.005   | 0.31                                      | 0.10; 0.52   | 0.004   | 0.27                                      | 0.04; 0.50   | 0.020   |
| - Using cyclosporin                    | 0.60                                      | 0.32; 0.88   | <0.001  | 0.60                                      | 0.32; 0.88   | <0.001  | 0.60                                      | 0.32; 0.88   | <0.001  | 0.42                                      | 0.12; 0.72   | 0.007   |
| - Using tacrolimus                     | 0.60                                      | 0.32; 0.88   | <0.001  | 0.60                                      | 0.32; 0.88   | <0.001  | 0.60                                      | 0.32; 0.88   | <0.001  | 0.42                                      | 0.12; 0.72   | 0.007   |
| Total HDL particle concentration       | -0.14                                     | -0.23; -0.04 | 0.006   | -0.14                                     | -0.23; -0.04 | 0.006   | -0.14                                     | -0.24; -0.04 | 0.006   | -0.14                                     | -0.24; -0.04 | 0.008   |
| sHDL proportion                        | 0.00                                      | -0.10; 0.09  | 0.934   |                                           |              |         |                                           |              |         |                                           |              |         |
| mHDL proportion                        |                                           |              |         | -0.01                                     | -0.10; 0.09  | 0.910   |                                           |              |         |                                           |              |         |
| lHDL proportion                        |                                           |              |         |                                           |              |         | 0.01                                      | -0.09; 0.11  | 0.820   |                                           |              |         |

## STROBE Statement- checklist for cross-sectional studies

|                           | Item No | Recommendation                                                                                                                                                                                    | Page No                                                         |
|---------------------------|---------|---------------------------------------------------------------------------------------------------------------------------------------------------------------------------------------------------|-----------------------------------------------------------------|
| Title and abstract        | 1       | (a) Indicate the study’s design with a commonly used term in the title or the abstract                                                                                                            | Abstract                                                        |
|                           |         | (b) Provide in the abstract an informative and balanced summary of what was done and what was found                                                                                               | Abstract                                                        |
| Introduction              |         |                                                                                                                                                                                                   |                                                                 |
| Background/rationale      | 2       | Explain the scientific background and rationale for the investigation being reported                                                                                                              | Introduction paragraph 2 trough 5                               |
| Objectives                | 3       | State specific objectives, including any prespecified hypotheses                                                                                                                                  | Introduction paragraph 2 and paragraph 6                        |
| Methods                   |         |                                                                                                                                                                                                   |                                                                 |
| Study design              | 4       | Present key elements of study design early in the paper                                                                                                                                           | Methods – Study population                                      |
| Setting                   | 5       | Describe the setting, locations, and relevant dates, including periods of recruitment, exposure, follow-up, and data collection                                                                   | Methods – Study population and Collection of data               |
| Participants              | 6       | (a) Give the eligibility criteria, and the sources and methods of selection of participants                                                                                                       | Methods – Study population                                      |
| Variables                 | 7       | Clearly define all outcomes, exposures, predictors, potential confounders, and effect modifiers. Give diagnostic criteria, if applicable                                                          | Table 1                                                         |
| Data sources/ measurement | 8       | For each variable of interest, give sources of data and details of methods of assessment (measurement). Describe comparability of assessment methods if there is more than one group              | Methods – Collection of data paragraph 1 through 3              |
| Bias                      | 9       | Describe any efforts to address potential sources of bias                                                                                                                                         | Methods – Statistical analysis paragraph 3                      |
| Study size                | 10      | Explain how the study size was arrived at                                                                                                                                                         | Supplementary Figure 1 and Methods – Study Population           |
| Quantitative variables    | 11      | Explain how quantitative variables were handled in the analyses. If applicable, describe which groupings were chosen and why                                                                      | Methods – Statistical analysis paragraph 1 trough 3             |
| Statistical methods       | 12      | (a) Describe all statistical methods, including those used to control for confounding                                                                                                             | Methods – Statistical analysis paragraph 1 trough 3             |
|                           |         | (b) Describe any methods used to examine subgroups and interactions                                                                                                                               | Methods – Statistical analysis paragraph 2 and paragraph 3      |
|                           |         | (c) Explain how missing data were addressed                                                                                                                                                       | Methods – Statistical analysis paragraph 2 and Footnote Table 1 |
|                           |         | (d) If applicable, describe analytical methods taking account of sampling strategy                                                                                                                | Not applicable                                                  |
|                           |         | (e) Describe any sensitivity analyses                                                                                                                                                             | Methods – Statistical analysis paragraph 3                      |
| Results                   |         |                                                                                                                                                                                                   |                                                                 |
| Participants              | 13      | (a) Report numbers of individuals at each stage of study—eg numbers potentially eligible, examined for eligibility, confirmed eligible, included in the study, completing follow-up, and analysed | Methods – Study population and Supplementary Figure 1           |
|                           |         | (b) Give reasons for non-participation at each stage                                                                                                                                              | Methods – Study population and Supplementary Figure 1           |
|                           |         | (c) Consider use of a flow diagram                                                                                                                                                                | Supplementary Figure 1                                          |
| Descriptive data          | 14      | (a) Give characteristics of study participants (eg demographic, clinical, social) and information on exposures and potential confounders                                                          | Table 1 and Results – Primary outcomes paragraph 1              |
|                           |         | (b) Indicate number of participants with missing data for each variable of interest                                                                                                               | Footnote Table 1                                                |
| Outcome data              | 15      | Report numbers of outcome events or summary measures                                                                                                                                              | Table 1 and Results – Primary outcomes paragraph 1              |

|                          |    |                                                                                                                                                                                                              |                                            |
|--------------------------|----|--------------------------------------------------------------------------------------------------------------------------------------------------------------------------------------------------------------|--------------------------------------------|
| Main results             | 16 | (a) Give unadjusted estimates and, if applicable, confounder-adjusted estimates and their precision (eg, 95% confidence interval). Make clear which confounders were adjusted for and why they were included | Table 1, Table 2 and Supplementary Table 1 |
|                          |    | (b) Report category boundaries when continuous variables were categorized                                                                                                                                    | Methods – Collection of data paragraph 2   |
|                          |    | (c) If relevant, consider translating estimates of relative risk into absolute risk for a meaningful time period                                                                                             | Not applicable                             |
| Other analyses           | 17 | Report other analyses done—eg analyses of subgroups and interactions, and sensitivity analyses                                                                                                               | Methods – Statistical analysis paragraph 3 |
| <b>Discussion</b>        |    |                                                                                                                                                                                                              |                                            |
| Key results              | 18 | Summarise key results with reference to study objectives                                                                                                                                                     | Discussion paragraph 1                     |
| Limitations              | 19 | Discuss limitations of the study, taking into account sources of potential bias or imprecision. Discuss both direction and magnitude of any potential bias                                                   | Discussion paragraph 3 and paragraph 7     |
| Interpretation           | 20 | Give a cautious overall interpretation of results considering objectives, limitations, multiplicity of analyses, results from similar studies, and other relevant evidence                                   | Discussion paragraph 2                     |
| Generalisability         | 21 | Discuss the generalisability (external validity) of the study results                                                                                                                                        | Discussion paragraph 4 through 6           |
| <b>Other information</b> |    |                                                                                                                                                                                                              |                                            |
| Funding                  | 22 | Give the source of funding and the role of the funders for the present study and, if applicable, for the original study on which the present article is based                                                | Funding and Acknowledgments                |
